# Supplementary material for: Novel malonic acid assisted synthesized porous Fe2O3 microspheres for ultra-fast response and recovery toward triethylamine
Source: Royal Society of Chemistry journal article supplement (doi:10.1039/d0nj00070a), 2020-01-01
Supplement: d0nj00070a1.pdf [file d0nj00070a1.pdf]

## Supporting Information

### A noval malonic acid assisted synthesized porous $\text{Fe}_2\text{O}_3$ microspheres for ultra-fast response and recovery toward TEA

Chengbo Zhai, Yi Liu, Liyong Du, Dongxue Wang, Mingzhe Zhang\*

*State Key Laboratory of Superhard Materials, Jilin University, Changchun 130012, People's Republic of China.*

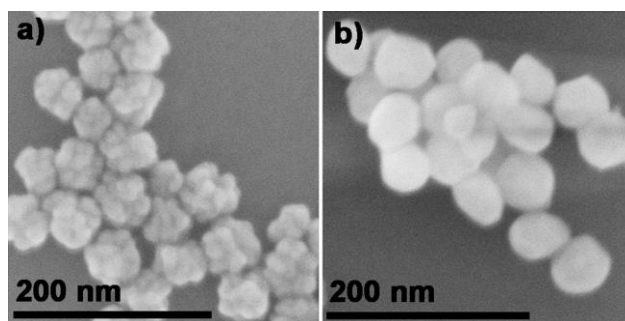

**Fig. S1** The SEM image of the (a) unannealed and (b) annealed  $\text{Fe}_2\text{O}_3$  nanoparticles.

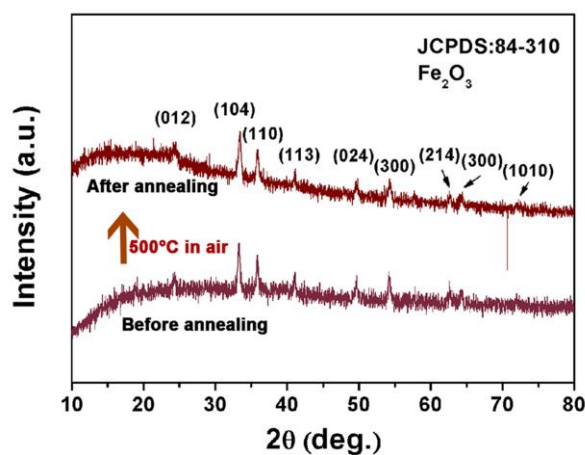

**Fig. S2** The XRD patterns of the nanoparticles before and after annealing.

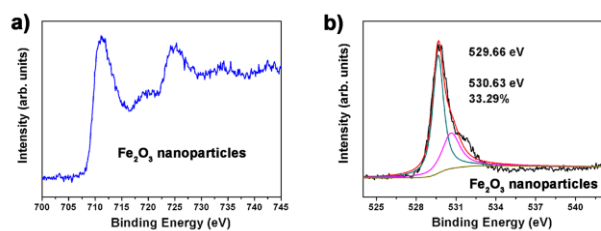

**Fig. S3** (a) The Fe 2p spectra and (b) the O 1s spectra of the  $\text{Fe}_2\text{O}_3$  nanoparticles.

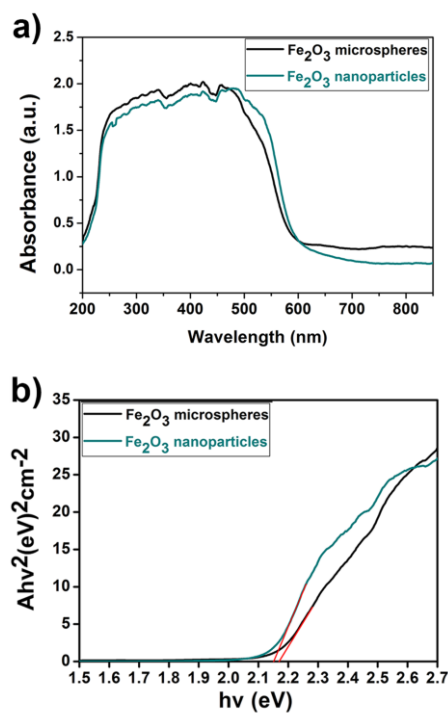

**Fig. S4** (a) The UV-vis absorbance spectrum for the porous  $\text{Fe}_2\text{O}_3$  microspheres and annealed  $\text{Fe}_2\text{O}_3$  nanoparticles, (b) The corresponding calculated results of band gap energies.
